# Supplementary material for: Nanopore direct RNA sequencing reveals METTL2A-mediated m 3 C sites in poly(A) RNA
Source: HighWire-hosted journal article supplement (doi:10.1101/gr.280269.124), 2025-10-30
Supplement: Supplemental_Tables.xlsx [file Supplemental_Tables.xlsx]

## Sheet: Table S1A
Supplementary Table S1A. Relative expression level of the m3C writers across various cancer types in comparison to their normal tissues.
gene_name	primary_site	group1	group2	n_normal	n_tumor	p	tumor_mean	tumor_median
METTL2A	Adrenal Gland	Normal	Tumor	126	77	1.72e-17	0.649306	0.56865
METTL2A	Bile duct	Normal	Tumor	9	36	1.58e-08	1.00366	0.92325
METTL2A	Bladder	Normal	Tumor	28	407	1.67e-08	0.799559	0.7425
METTL2A	Blood	Normal	Tumor	941	595	4.62e-134	0.902266	0.9171
METTL2A	Brain	Normal	Tumor	1153	689	1.56e-279	1.55777	1.5831
METTL2A	Breast	Normal	Tumor	291	1099	4.63e-113	1.93561	1.8063
METTL2A	Cervix	Normal	Tumor	3	305	0.175	0.246343	0.2213
METTL2A	Colon	Normal	Tumor	348	289	1.77e-84	1.90799	1.8831
METTL2A	Endometrium	Normal	Tumor	23	181	2.57e-07	0.5783	0.546
METTL2A	Esophagus	Normal	Tumor	667	182	1.67e-91	1.91066	1.8566
METTL2A	Head and Neck region	Normal	Tumor	44	520	0.0794	0.14198	0.1011
METTL2A	Kidney	Normal	Tumor	168	1025	5.39e-51	0.604348	0.57975
METTL2A	Liver	Normal	Tumor	160	371	1.11e-47	1.00733	1.0632
METTL2A	Lung	Normal	Tumor	397	1013	9.12e-147	2.35443	2.3051
METTL2A	Ovary	Normal	Tumor	88	427	5.48e-49	2.46926	2.43245
METTL2A	Pancreas	Normal	Tumor	171	179	1.74e-57	1.66037	1.5872
METTL2A	Paraganglia	Normal	Tumor	3	182	0.437	-0.25555	-0.22475
METTL2A	Prostate	Normal	Tumor	151	495	3.95e-32	1.56834	1.5417
METTL2A	Rectum	Normal	Tumor	10	93	0.636	-0.0836382	-0.05115
METTL2A	Skin	Normal	Tumor	557	469	3.26e-164	1.64991	1.6316
METTL2A	Soft tissue,Bone	Normal	Tumor	2	262	0.672	0.199001	0.2117
METTL2A	Stomach	Normal	Tumor	211	413	3.55e-76	1.73313	1.7343
METTL2A	Testis	Normal	Tumor	165	154	2.48e-53	1.52277	1.56435
METTL2A	Thymus	Normal	Tumor	2	119	0.305	0.156018	0.165
METTL2A	Thyroid Gland	Normal	Tumor	59	512	2.62e-09	0.203971	0.24005
METTL2A	Uterus	Normal	Tumor	78	57	4.12e-23	2.39449	2.4002
METTL2B	Adrenal Gland	Normal	Tumor	126	77	1.13e-26	0.990423	0.98685
METTL2B	Bile duct	Normal	Tumor	9	36	6.52e-06	0.784869	0.7474
METTL2B	Bladder	Normal	Tumor	28	407	5.98e-06	0.499952	0.5094
METTL2B	Blood	Normal	Tumor	941	595	8.01e-128	0.887648	0.8289
METTL2B	Brain	Normal	Tumor	1153	689	8.04e-267	1.32825	1.3284
METTL2B	Breast	Normal	Tumor	291	1099	1.11e-77	1.32455	1.3051
METTL2B	Cervix	Normal	Tumor	3	305	0.466	-0.181792	-0.1728
METTL2B	Colon	Normal	Tumor	348	289	1.58e-94	1.74906	1.74305
METTL2B	Endometrium	Normal	Tumor	23	181	0.137	0.181076	0.1738
METTL2B	Esophagus	Normal	Tumor	667	182	7.14e-86	1.52876	1.51905
METTL2B	Head and Neck region	Normal	Tumor	44	520	0.0141	-0.169339	-0.1691
METTL2B	Kidney	Normal	Tumor	168	1025	6.63e-55	0.69085	0.64985
METTL2B	Liver	Normal	Tumor	160	371	3.74e-41	0.821759	0.8499
METTL2B	Lung	Normal	Tumor	397	1013	4.61e-128	1.86265	1.8412
METTL2B	Ovary	Normal	Tumor	88	427	2.33e-48	1.94185	1.9858
METTL2B	Pancreas	Normal	Tumor	171	179	1.74e-57	1.54501	1.5118
METTL2B	Paraganglia	Normal	Tumor	3	182	0.652	0.105996	0.06145
METTL2B	Prostate	Normal	Tumor	151	495	2.48e-33	1.35876	1.3319
METTL2B	Rectum	Normal	Tumor	10	93	0.041	0.264529	0.2918
METTL2B	Skin	Normal	Tumor	557	469	2.79e-159	1.62302	1.622
METTL2B	Soft tissue,Bone	Normal	Tumor	2	262	0.561	0.246352	0.2648
METTL2B	Stomach	Normal	Tumor	211	413	3.9e-75	1.64623	1.6275
METTL2B	Testis	Normal	Tumor	165	154	9.71e-54	2.30007	2.3194
METTL2B	Thymus	Normal	Tumor	2	119	0.879	-0.0417479	-0.0396
METTL2B	Thyroid Gland	Normal	Tumor	59	512	6.97e-08	0.231544	0.25225
METTL2B	Uterus	Normal	Tumor	78	57	4.12e-23	2.00054	2.0409
METTL6	Adrenal Gland	Normal	Tumor	126	77	8.34e-17	0.715696	0.6953
METTL6	Bile duct	Normal	Tumor	9	36	3.18e-06	1.31287	1.41855
METTL6	Bladder	Normal	Tumor	28	407	8.29e-11	0.788774	0.78125
METTL6	Blood	Normal	Tumor	941	595	4.32e-23	0.423057	0.5497
METTL6	Brain	Normal	Tumor	1153	689	1.46e-210	0.710419	0.7407
METTL6	Breast	Normal	Tumor	291	1099	2.77e-101	1.52582	1.4703
METTL6	Cervix	Normal	Tumor	3	305	0.759	-0.042038	-0.005
METTL6	Colon	Normal	Tumor	348	289	1.56e-87	1.21993	1.23695
METTL6	Endometrium	Normal	Tumor	23	181	0.304	0.133172	0.0517
METTL6	Esophagus	Normal	Tumor	667	182	2.85e-80	1.11643	1.05385
METTL6	Head and Neck region	Normal	Tumor	44	520	0.429	0.059361	0.03035
METTL6	Kidney	Normal	Tumor	168	1025	2.23e-36	0.516887	0.48965
METTL6	Liver	Normal	Tumor	160	371	3.6e-42	0.971459	1.0079
METTL6	Lung	Normal	Tumor	397	1013	1.39e-108	1.57786	1.5596
METTL6	Ovary	Normal	Tumor	88	427	3.11e-47	1.54535	1.53205
METTL6	Pancreas	Normal	Tumor	171	179	6.9e-56	1.82121	1.812
METTL6	Paraganglia	Normal	Tumor	3	182	0.376	0.417763	0.4099
METTL6	Prostate	Normal	Tumor	151	495	1.58e-32	1.19767	1.152
METTL6	Rectum	Normal	Tumor	10	93	0.218	0.235044	0.31665
METTL6	Skin	Normal	Tumor	557	469	2.88e-164	1.78676	1.7433
METTL6	Soft tissue,Bone	Normal	Tumor	2	262	0.195	0.735693	0.7428
METTL6	Stomach	Normal	Tumor	211	413	5.28e-64	1.09184	1.0477
METTL6	Testis	Normal	Tumor	165	154	0.000132	-0.275113	-0.28425
METTL6	Thymus	Normal	Tumor	2	119	0.879	0.00462941	0.0631
METTL6	Thyroid Gland	Normal	Tumor	59	512	5.06e-09	0.173924	0.22405
METTL6	Uterus	Normal	Tumor	78	57	4.12e-23	1.87019	1.83065
METTL8	Adrenal Gland	Normal	Tumor	126	77	0.000637	0.246727	0.22065
METTL8	Bile duct	Normal	Tumor	9	36	5.17e-06	1.20415	1.15575
METTL8	Bladder	Normal	Tumor	28	407	0.483	0.0581101	0.035
METTL8	Blood	Normal	Tumor	941	595	3.01e-195	1.68584	1.6744
METTL8	Brain	Normal	Tumor	1153	689	7.39e-148	0.785675	0.797
METTL8	Breast	Normal	Tumor	291	1099	1.04e-66	1.22026	1.2071
METTL8	Cervix	Normal	Tumor	3	305	0.186	0.574902	0.574
METTL8	Colon	Normal	Tumor	348	289	2.43e-70	0.898296	0.85705
METTL8	Endometrium	Normal	Tumor	23	181	0.304	-0.109003	-0.1823
METTL8	Esophagus	Normal	Tumor	667	182	1.87e-85	1.48417	1.48255
METTL8	Head and Neck region	Normal	Tumor	44	520	0.00044	0.308111	0.3224
METTL8	Kidney	Normal	Tumor	168	1025	3.21e-36	0.505674	0.56675
METTL8	Liver	Normal	Tumor	160	371	4.56e-22	0.534975	0.5135
METTL8	Lung	Normal	Tumor	397	1013	6.84e-151	1.92804	1.8937
METTL8	Ovary	Normal	Tumor	88	427	9.32e-46	1.59018	1.65555
METTL8	Pancreas	Normal	Tumor	171	179	6.29e-54	1.95626	1.9546
METTL8	Paraganglia	Normal	Tumor	3	182	0.0473	-0.450684	-0.42285
METTL8	Prostate	Normal	Tumor	151	495	1.06e-25	0.96197	1.0007
METTL8	Rectum	Normal	Tumor	10	93	0.426	-0.174419	-0.15845
METTL8	Skin	Normal	Tumor	557	469	3.13e-07	0.124414	0.1372
METTL8	Soft tissue,Bone	Normal	Tumor	2	262	0.734	-0.385082	-0.3433
METTL8	Stomach	Normal	Tumor	211	413	8.54e-67	2.14986	2.2065
METTL8	Testis	Normal	Tumor	165	154	3.71e-52	1.65723	1.64565
METTL8	Thymus	Normal	Tumor	2	119	0.784	0.102418	0.0381
METTL8	Thyroid Gland	Normal	Tumor	59	512	0.00104	-0.168555	-0.13285
METTL8	Uterus	Normal	Tumor	78	57	1.94e-22	1.59228	1.6992

## Sheet: Table S1B
Supplementary Table S1B. The association between the m3C writer expression and patient prognosis across various cancer types.
gene_name	primary_site	p.value	group
METTL8	Colon	0.967551	not significant
METTL8	Kidney	3.94019e-06	unfavorable in high
METTL8	Uterus	0.0296157	favorable in high
METTL8	Stomach	0.231832	not significant
METTL8	Breast	0.432313	not significant
METTL8	Bile duct	0.775398	not significant
METTL8	Brain	0.000822607	unfavorable in high
METTL8	Ovary	0.00670795	favorable in high
METTL8	Prostate	0.596157	not significant
METTL8	Soft tissue,Bone	0.00861703	favorable in high
METTL8	Paraganglia	0.170944	not significant
METTL8	Head and Neck region	0.425429	not significant
METTL8	Thyroid Gland	0.999287	not significant
METTL8	Bladder	0.081333	not significant
METTL8	Endometrium	0.0410383	unfavorable in high
METTL8	Skin	0.503254	not significant
METTL8	Lung	0.40922	not significant
METTL8	Liver	0.272177	not significant
METTL8	Cervix	0.325968	not significant
METTL8	Esophagus	0.280121	not significant
METTL8	Pancreas	0.359071	not significant
METTL8	Blood	0.343206	not significant
METTL8	Adrenal Gland	0.0225156	unfavorable in high
METTL8	Lining of body cavities	0.268826	not significant
METTL8	Testis	0.710643	not significant
METTL8	Thymus	0.171593	not significant
METTL8	Rectum	0.212556	not significant
METTL8	Eye	0.424725	not significant
METTL8	Lymphatic tissue	0.889003	not significant
METTL6	Colon	0.183044	not significant
METTL6	Kidney	7.18025e-09	unfavorable in high
METTL6	Uterus	0.148587	not significant
METTL6	Stomach	0.143946	not significant
METTL6	Breast	0.0678765	not significant
METTL6	Bile duct	0.376678	not significant
METTL6	Brain	0.0442665	favorable in high
METTL6	Ovary	0.676921	not significant
METTL6	Prostate	0.230257	not significant
METTL6	Soft tissue,Bone	0.318147	not significant
METTL6	Paraganglia	0.886017	not significant
METTL6	Head and Neck region	0.34008	not significant
METTL6	Thyroid Gland	0.250337	not significant
METTL6	Bladder	0.974195	not significant
METTL6	Endometrium	0.00908528	unfavorable in high
METTL6	Skin	0.163633	not significant
METTL6	Lung	0.474641	not significant
METTL6	Liver	0.0724699	not significant
METTL6	Cervix	0.443921	not significant
METTL6	Esophagus	0.230804	not significant
METTL6	Pancreas	0.0614944	not significant
METTL6	Blood	0.0056436	unfavorable in high
METTL6	Adrenal Gland	0.336298	not significant
METTL6	Lining of body cavities	0.923221	not significant
METTL6	Testis	0.31693	not significant
METTL6	Thymus	0.215281	not significant
METTL6	Rectum	0.146186	not significant
METTL6	Eye	0.00047551	favorable in high
METTL6	Lymphatic tissue	0.973364	not significant
METTL2B	Colon	0.764517	not significant
METTL2B	Kidney	0.00836114	unfavorable in high
METTL2B	Uterus	0.323602	not significant
METTL2B	Stomach	0.809417	not significant
METTL2B	Breast	0.108422	not significant
METTL2B	Bile duct	0.665297	not significant
METTL2B	Brain	3.67101e-05	unfavorable in high
METTL2B	Ovary	0.776141	not significant
METTL2B	Prostate	0.575831	not significant
METTL2B	Soft tissue,Bone	0.440187	not significant
METTL2B	Paraganglia	0.686509	not significant
METTL2B	Head and Neck region	0.544382	not significant
METTL2B	Thyroid Gland	0.296441	not significant
METTL2B	Bladder	0.725492	not significant
METTL2B	Endometrium	0.126965	not significant
METTL2B	Skin	0.947489	not significant
METTL2B	Lung	0.453194	not significant
METTL2B	Liver	0.098646	not significant
METTL2B	Cervix	0.0473521	unfavorable in high
METTL2B	Esophagus	0.583812	not significant
METTL2B	Pancreas	0.170755	not significant
METTL2B	Blood	0.834144	not significant
METTL2B	Adrenal Gland	0.270312	not significant
METTL2B	Lining of body cavities	0.122	not significant
METTL2B	Testis	0.998866	not significant
METTL2B	Thymus	0.414413	not significant
METTL2B	Rectum	0.360805	not significant
METTL2B	Eye	0.624961	not significant
METTL2B	Lymphatic tissue	0.824304	not significant
METTL2A	Colon	0.604861	not significant
METTL2A	Kidney	0.0286317	unfavorable in high
METTL2A	Uterus	0.000347421	favorable in high
METTL2A	Stomach	0.500446	not significant
METTL2A	Breast	0.334884	not significant
METTL2A	Bile duct	0.620427	not significant
METTL2A	Brain	0.00031789	unfavorable in high
METTL2A	Ovary	0.984862	not significant
METTL2A	Prostate	0.393555	not significant
METTL2A	Soft tissue,Bone	0.123768	not significant
METTL2A	Paraganglia	0.159231	not significant
METTL2A	Head and Neck region	0.133024	not significant
METTL2A	Thyroid Gland	0.0529755	not significant
METTL2A	Bladder	0.979952	not significant
METTL2A	Endometrium	0.16994	not significant
METTL2A	Skin	0.356921	not significant
METTL2A	Lung	0.942387	not significant
METTL2A	Liver	0.727584	not significant
METTL2A	Cervix	0.0950202	not significant
METTL2A	Esophagus	0.66659	not significant
METTL2A	Pancreas	0.0335881	unfavorable in high
METTL2A	Blood	0.352856	not significant
METTL2A	Adrenal Gland	0.0851024	not significant
METTL2A	Lining of body cavities	0.576315	not significant
METTL2A	Testis	0.450804	not significant
METTL2A	Thymus	0.256028	not significant
METTL2A	Rectum	0.876149	not significant
METTL2A	Eye	0.698772	not significant
METTL2A	Lymphatic tissue	0.62977	not significant

## Sheet: Table S2
Supplementary Table S2 Cloning primers
Construct	Fwd	Rev
pcDNA3.1 FLAG METTL2A	AAAGATATCATGGCCGGCTCCTACCCTGA	AAACTCGAGGCTGGTGCTGGACAGAAGGG
gCBE v3 S100A4	aaaggacgaaacaccCCAGATCCTGACTGCTGTCAgttttagagctagaa	ttctagctctaaaacTGACAGCAGTCAGGATCTGGggtgtttcgtccttt

## Sheet: Table S3
Supplementary Table S3 siRNAs.
Gene name		Sequence or Catalog Number	Company
Control		GTCTCAAAGACGTATTTGAAG	GeneDesign
METTL2A	#1	CTGGCGGGATGATGCTTCTGC	GeneDesign
METTL2A	#2	TGATGCTTCTGCGAGATTACG	GeneDesign
Control		4390844	Thermo Fisher Scientific
S100A4-201	#1	TGTTGCTATAGTACGTGT	Thermo Fisher Scientific
S100A4-201	#2	GCACACGCTGTTGCTATA	Thermo Fisher Scientific
METTL2B	#1	s31536	Thermo Fisher Scientific
METTL2B	#2	s195288	Thermo Fisher Scientific
METTL6	#1	s43656	Thermo Fisher Scientific
METTL6	#2	s43655	Thermo Fisher Scientific
METTL8	#1	s36423	Thermo Fisher Scientific
METTL8	#2	s36424	Thermo Fisher Scientific

## Sheet: Table S4
Supplementary Table S4 qPCR primers
Gene name	Fwd	Rev
ACTB	CCAACCGCGAGAAGAT	CCAGAGGCGTACAGGG
METTL2A	ATTGTAGCACTGGGCGTGGT	CAGTCCAACCTGGGCAAAA
METTL2B	TTTGTAGCACCGGGCATGGT	TTTTGCCCAGGCTGGACTC
METTL6	TGCCTGTGATTTTTCTCCAAGAGCCA	TCAGATCACACTGGAATACCTTGCA
METTL8	ACTGACCCAGCCAAAGTTTTTGA	TCTGGCTGCTGCTTCTTCTTCCT
S100A4-201	GTGCTTCTGAGATGTGGGCT	TTCTCCAGAGGGCACGCCAT
S100A4-204	CGCTTCTTCTTTCTTGGTTTGAT	CGGGTCAGCAGCTCCTTTAG
